# Supplementary material for: Mechanobiological modulation of blood–brain barrier permeability by laser stimulation of endothelial-targeted nanoparticles
Source: Royal Society of Chemistry journal article supplement (doi:10.1039/d2nr05062e), 2023-01-01
Supplement: d2nr05062e1.pdf [file d2nr05062e1.pdf]

**Video S1: Ca<sup>2+</sup> signal elevation and propagation after laser stimulation.** A representative video shows the cytosolic Ca<sup>2+</sup> signal increase immediately in the laser spot after laser stimulation of AuNP-LEL. The Ca<sup>2+</sup> signal then propagates to adjacent cells. Laser stimulation time is defined as 0 second. We recorded a baseline of 42 seconds and a time duration of 1 minute 46 seconds after laser stimulation.
